# Supplementary material for: Using Complex Networks to Characterize International Business Cycles
Source: PLoS One. 2013 Mar 4;8(3):e58109. doi: 10.1371/journal.pone.0058109 (PMC3587567; doi:10.1371/journal.pone.0058109)
Supplement: Materials S2 — This file contains information regarding the optimal lag lengths as detected by the Granger causality tests between country i (on rows) and country j (on columns). Diagonals’ values are missing since we do not run causality tests between a time series and itself. There are two sheets, one for the data in growth specification (log differenced) and one for HP filtered data, namely Growth data sheet and HP filtered data sheet. The abbreviations correspond to the names which can be found in Table 1. (XLS) [file pone.0058109.s002.xls]

## Sheet: Growth data
	aus	aut	bel	can	chl	dnk	fin	fra	ger	grc	isl	irn	isr	ita	jpn	kor	lux	mex	nld	nzl	nor	pol	prt	swe	che	tur	gbr	usa
aus	3	4	7	3	3	6	3	8	8	8	7	3	6	7	4	3	7	3	7	3	8	3	8	7	7	3	5	6
aut	5	4	8	4	2	8	3	8	6	8	8	8	7	8	3	4	8	8	4	4	6	2	8	3	4	5	4	7
bel	8	8	1	1	1	6	5	8	7	7	5	8	8	7	1	1	7	5	8	5	3	1	7	5	8	6	2	2
can	2	4	2	1	1	1	2	1	2	2	6	2	2	7	2	1	2	2	2	8	3	2	8	6	8	6	5	1
chl	8	8	8	5	5	6	8	8	8	5	7	5	8	8	7	5	8	5	8	7	6	6	8	8	8	8	8	8
dnk	7	2	6	4	8	1	6	3	1	7	1	7	8	6	2	1	7	1	1	8	8	8	7	4	7	8	8	8
fin	1	2	5	1	8	3	1	1	4	5	5	2	8	1	5	2	8	1	1	8	8	8	4	7	4	7	2	1
fra	8	7	8	1	1	8	1	1	8	7	8	7	7	1	1	8	8	8	1	8	5	4	1	8	3	7	8	8
ger	8	1	1	1	3	7	1	4	1	7	4	1	1	2	6	1	4	7	1	1	1	7	4	1	3	6	4	4
grc	6	4	1	7	7	6	6	6	3	1	1	1	7	7	8	1	8	2	8	6	8	8	8	8	6	1	8	1
isl	8	6	1	7	1	6	8	1	6	8	1	8	5	8	7	1	8	6	8	6	6	8	1	8	8	8	8	8
irn	8	8	7	6	6	8	8	8	8	7	8	8	8	8	7	8	8	8	8	8	8	6	7	6	6	8	8	8
isr	5	4	1	4	2	8	1	1	1	1	1	1	1	1	2	5	1	8	1	1	5	1	1	8	1	1	2	2
ita	8	8	8	1	8	8	8	4	8	7	7	8	8	1	1	8	8	7	8	8	8	7	7	6	3	8	8	3
jpn	2	2	4	1	2	2	5	6	2	2	2	7	3	6	2	2	2	4	2	2	2	2	8	8	3	6	7	1
kor	1	1	6	1	1	5	4	5	1	1	1	1	1	5	1	1	7	4	1	1	1	1	5	1	7	8	1	1
lux	8	2	5	1	6	1	1	1	4	8	7	8	8	1	8	8	1	6	4	7	4	8	8	1	1	3	5	8
mex	1	2	1	1	1	2	1	2	1	1	1	2	6	1	1	1	1	1	1	1	1	1	1	1	1	1	2	1
nld	8	4	1	8	8	1	8	6	6	8	7	6	8	5	2	6	7	8	1	8	6	7	6	8	1	8	6	8
nzl	2	6	2	1	1	7	8	8	7	8	6	1	5	1	1	7	8	5	1	1	8	2	8	1	8	1	8	2
nor	4	7	7	5	1	1	1	7	8	4	1	8	1	7	7	1	7	1	6	1	2	5	2	5	8	8	5	8
pol	1	7	3	1	8	1	1	8	1	1	1	8	1	7	3	1	1	1	1	6	5	1	8	1	1	1	2	1
prt	8	8	6	8	3	8	1	1	8	7	8	7	8	6	1	8	8	6	8	8	8	4	1	8	8	8	8	2
swe	1	7	1	1	1	2	1	1	8	1	1	1	8	1	1	1	5	1	1	8	1	1	3	1	4	7	1	1
che	7	7	7	7	8	8	5	5	8	8	3	3	6	7	8	3	8	8	7	3	8	7	8	8	3	6	8	7
tur	1	1	1	1	1	1	1	1	1	1	1	1	1	1	1	1	1	1	1	3	1	1	1	1	1	6	1	1
gbr	7	4	8	6	8	7	8	7	8	8	8	6	8	7	8	7	6	7	7	8	8	7	7	6	8	7	6	8
usa	7	4	8	7	8	8	7	7	8	8	8	6	8	8	8	8	8	8	7	7	8	8	7	8	8	8	5	1

## Sheet: HP filtered data
	aus	aut	bel	can	chl	dnk	fin	fra	ger	grc	hun	isl	irn	isr	ita	jpn	kor	lux	mex	nld	nzl	nor	pol	prt	esp	swe	che	tur	gbr	usa
aus	7	7	7	8	8	6	8	8	8	8	7	8	8	7	7	7	8	8	7	8	7	8	8	7	8	8	7	8	6	8
aut	1	1	5	1	1	3	1	7	2	5	1	1	1	1	7	7	1	8	5	7	5	7	1	7	5	3	7	1	3	1
bel	8	8	4	1	8	4	4	8	8	7	4	4	8	8	8	4	4	8	4	8	4	4	1	7	8	5	8	5	1	1
can	1	8	2	1	1	1	1	8	2	8	1	8	1	5	6	2	1	1	1	1	8	1	2	8	8	6	8	3	8	1
chl	8	8	8	7	5	8	8	8	8	5	5	7	8	8	8	6	6	8	8	8	8	8	6	7	8	8	7	8	7	7
dnk	8	8	8	7	8	1	1	7	4	8	7	2	8	7	3	7	1	8	7	1	8	8	5	1	2	6	4	8	8	7
fin	1	1	2	1	8	1	1	2	5	5	1	4	1	1	2	5	2	2	1	1	4	3	1	4	2	1	1	3	2	1
fra	2	8	7	5	5	8	2	1	8	7	7	7	8	7	3	5	6	8	8	5	8	5	1	5	8	7	3	8	8	1
ger	8	1	8	1	3	1	1	1	1	4	5	1	1	1	8	7	8	5	8	2	5	1	8	5	5	1	3	1	3	5
grc	7	3	3	5	3	6	5	7	8	3	8	3	8	6	7	8	3	8	3	5	7	8	8	4	5	4	3	5	5	3
hun	1	1	1	1	1	1	1	1	1	8	1	1	1	6	1	7	1	1	1	1	1	1	3	1	1	1	1	1	1	1
isl	6	1	2	3	4	5	8	1	2	1	3	1	4	4	2	6	4	2	6	8	5	6	1	2	2	1	2	8	1	1
irn	5	8	8	6	8	8	8	8	6	8	7	8	5	8	7	8	6	8	8	8	8	6	7	7	7	7	7	8	8	8
isr	4	4	1	5	1	8	4	4	1	2	4	2	4	1	1	5	4	8	7	2	1	4	4	1	2	1	4	4	3	3
ita	8	8	8	8	8	8	8	8	4	8	1	7	6	8	1	8	8	8	8	8	8	8	8	7	8	1	1	8	4	1
jpn	2	8	1	1	8	1	1	8	7	1	8	1	1	3	1	1	1	8	4	8	3	1	1	1	8	7	4	5	1	1
kor	1	8	8	1	1	5	4	7	1	1	1	1	1	1	1	1	2	7	4	1	1	1	1	8	8	1	5	8	1	1
lux	8	8	8	1	7	1	1	1	8	1	1	8	8	1	1	1	1	1	8	8	7	1	8	8	1	1	1	1	6	1
mex	1	1	1	1	1	1	1	1	1	1	1	1	6	1	1	1	1	1	1	1	2	1	1	1	1	1	1	1	1	1
nld	6	5	8	7	8	1	7	2	2	8	8	6	8	8	5	7	6	6	7	1	8	7	7	6	4	2	1	8	7	7
nzl	1	8	1	1	1	7	8	8	7	8	8	8	7	6	8	7	7	8	5	1	1	7	2	8	1	1	8	5	8	1
nor	8	2	6	5	1	5	8	8	7	2	3	5	1	1	5	6	1	6	1	8	8	1	2	1	1	8	8	8	5	6
pol	8	8	8	8	8	8	1	8	8	8	1	8	1	1	8	7	1	1	8	8	8	2	8	8	8	8	1	1	8	8
prt	8	8	8	8	3	8	8	8	8	7	7	8	8	8	8	8	8	8	6	8	8	8	8	1	8	8	8	8	7	8
esp	8	5	8	8	8	5	8	7	6	8	7	8	7	8	8	8	7	8	5	8	8	5	8	8	5	8	8	8	5	8
swe	1	1	1	1	1	1	1	1	7	1	1	1	1	1	1	4	8	7	1	1	6	1	1	3	1	1	1	3	1	1
che	7	5	8	8	8	8	3	4	8	8	2	7	8	3	8	6	8	8	8	8	5	8	8	8	6	3	3	3	8	8
tur	4	4	1	4	4	3	7	1	1	3	4	7	1	1	4	7	4	4	7	3	8	4	5	3	6	8	7	1	1	4
gbr	7	3	7	1	3	6	5	8	3	5	1	8	8	7	7	5	7	3	5	8	4	7	1	7	7	5	6	4	1	1
usa	8	6	6	6	7	8	3	1	8	8	6	8	8	7	6	6	7	7	7	6	7	6	8	7	8	6	8	8	8	1

## Sheet: Note
	Note:
	This file contains information regarding the optimal lag lengths as detected by the Granger causality tests between country i (on rows) and country j (on columns).
	Diagonals' values are missing since we do not run causality tests between a time series and itself.
	There are two sheets, one for the data in growth specification (log differenced) and one for HP filtered data, namely Growth data sheet and HP filtered data sheet.
	The abbreviations correspond to the names which can be found in Table 1.
