# Supplementary material for: Using Complex Networks to Characterize International Business Cycles
Source: PLoS One. 2013 Mar 4;8(3):e58109. doi: 10.1371/journal.pone.0058109 (PMC3587567; doi:10.1371/journal.pone.0058109)
Supplement: Materials S3 — This file contains information regarding the F statistics as produced by the Granger causality tests between country i (on rows) and country j (on columns). Diagonals’ values are missing since we do not run causality tests between a time series and itself. There are two sheets, one for the data in growth specification (log differenced) and one for HP filtered data, namely Growth data sheet and HP filtered data sheet. The abbreviations correspond to the names which can be found in Table 1. (XLS) [file pone.0058109.s003.xls]

## Sheet: Growth rates
	aus	aut	bel	can	chl	dnk	fin	fra	ger	grc	isl	irn	isr	ita	jpn	kor	lux	mex	nld	nzl	nor	pol	prt	swe	che	tur	gbr	usa
aus		7.42709	6.38663	4.42311	3.58068	5.12925	7.09109	5.8746	5.05027	3.7416	4.49237	11.4575	4.09002	8.30777	4.81982	5.12321	4.28492	4.40698	4.24626	3.57842	4.57227	10.2274	6.23331	4.55981	7.29291	4.85472	6.8543	4.34381
aut	7.03317		8.31888	8.3304	4.42066	6.97637	5.09734	8.13577	10.7844	14.3766	4.36351	4.09081	3.81535	8.77834	13.7314	4.31541	5.88491	4.67577	5.02912	3.4528	5.22775	3.30617	7.03053	8.30213	5.27274	3.90985	9.90113	11.5465
bel	9.04185	6.77272		8.49611	4.17616	5.71235	5.226	6.41916	8.20015	6.78041	6.2636	4.58012	4.97701	5.83531	9.49736	6.84455	7.49232	7.41157	4.91432	6.02776	8.9796	5.44646	8.04016	9.30567	4.618	6.04751	22.3756	11.2046
can	3.51478	5.90259	6.53441		5.62378	1.34516	2.60189	0.860907	3.15029	2.99546	0.243922	2.75385	2.52331	1.58178	3.96637	1.10978	4.34247	3.53622	2.16438	0.350239	3.38017	4.74497	1.67181	2.23045	7.70851	3.27321	2.72832	1.36848
chl	7.91173	10.0864	8.95818	6.1518		7.20575	8.29987	6.52482	9.66985	9.05032	6.74111	13.6746	6.48394	7.51852	12.8546	12.3765	6.00785	7.39091	9.60156	6.56229	7.98513	7.77064	6.26334	7.26798	8.9833	7.15744	7.75066	6.9928
dnk	6.18167	6.29947	8.84907	3.67996	4.89723		1.12007	7.94693	5.73819	10.8739	3.05454	0.296419	3.13514	6.12606	7.40719	0.283168	5.16375	0.252036	6.73938	0.263828	1.36445	4.69647	8.04128	3.09093	11.5219	2.07936	6.3734	4.99178
fin	9.54058	5.34526	3.31117	5.53715	0.430914	3.82067		0.127194	3.23971	1.67567	2.70335	2.18208	0.228852	0.256883	2.76139	2.13408	6.31488	0.503489	0.705638	5.2138	4.67085	1.1253	3.92998	1.22069	3.74422	2.86373	8.69341	6.78442
fra	7.73839	3.45049	4.22211	7.24198	5.34449	3.82739	2.74079		4.82468	11.3522	5.3356	2.95303	4.44963	3.47182	13.7129	3.32259	4.66397	4.26524	3.72973	2.54904	7.47754	4.28757	4.06319	3.92118	7.82737	4.78307	8.07164	8.11821
ger	4.37417	1.35433	1.73259	0.887921	4.92366	0.995459	0.748656	3.88088		2.65201	3.23368	0.903487	0.975659	3.96168	5.924	2.78649	5.16177	4.14436	0.726935	2.47539	0.72971	3.05267	3.50581	0.798853	4.60172	3.2625	4.25966	5.57506
grc	11.9123	6.38818	8.27391	17.251	7.84651	7.54462	7.86934	7.49807	5.97064		10.2076	15.8607	7.46127	5.17919	10.7803	9.41142	8.48735	7.45051	5.9079	8.9843	7.69162	10.7045	7.44743	10.0824	5.91998	11.602	18.0896	16.0668
isl	5.4802	4.66693	4.95243	8.94855	4.78021	6.53052	6.4573	3.57888	4.13908	5.2658		5.76928	9.32885	5.91761	5.22623	4.01362	6.00093	4.02521	4.74569	7.84061	5.71335	3.55829	3.81165	5.49456	7.28662	5.71	5.1502	6.66808
irn	1.13765	11.796	5.8152	3.66876	1.82805	9.02826	3.08794	9.44221	12.458	1.13625	1.68804		1.40309	15.5125	2.57076	4.66287	1.64147	1.25966	3.81169	1.54557	2.48996	3.00087	3.99844	3.39993	5.71642	2.33761	5.23883	4.83443
isr	4.9661	5.4988	4.7805	4.80554	4.27467	2.32701	2.23837	2.66482	2.25607	2.97183	5.46681	2.71553		2.57943	3.04031	3.82815	9.92446	4.65457	3.50402	4.27036	2.30317	3.47622	6.12351	2.20898	5.3333	2.21182	3.14129	4.19737
ita	9.07647	3.76252	5.26368	5.25585	8.31609	4.39584	3.4181	4.73983	5.09319	10.3436	5.84372	3.55029	4.02192		13.6643	4.15129	6.19286	4.36405	4.30806	3.59173	6.46007	3.59935	6.81456	5.14661	11.7635	3.39774	11.0457	6.00196
jpn	10.153	5.19013	4.98132	9.87498	6.54214	6.18498	4.6014	7.53239	4.34793	5.00741	6.1696	5.2195	5.39782	14.3216		5.83377	5.15156	5.86068	5.01989	5.61499	5.17718	4.19136	4.81972	5.62981	4.75636	5.41677	7.55514	13.7278
kor	0.483756	0.706969	0.805032	0.489874	3.10329	0.645381	4.80261	1.39241	0.627494	0.47339	0.520422	1.0978	0.464407	0.477352	1.39343		0.481776	5.00968	0.589861	0.609172	1.24775	1.36641	0.808758	0.74039	0.701261	0.455954	1.74594	1.54128
lux	5.00946	5.41241	4.49335	5.20398	5.70118	4.35047	4.83737	5.11059	7.28443	4.64322	6.08728	4.92849	4.88806	4.1977	9.92706	4.53733		7.10095	6.23313	5.05926	4.55005	4.68595	4.82482	5.39755	4.48844	7.2459	9.3132	6.95013
mex	1.52817	2.80215	2.34716	2.05292	3.32164	2.64716	1.8787	3.85812	1.88335	2.77826	2.88408	6.10477	1.02328	2.3921	2.37046	0.963222	1.00087		3.11498	1.08938	1.2125	3.13809	1.22024	1.33169	1.4005	4.96706	3.14506	2.64221
nld	4.01195	4.76411	3.10121	4.14616	4.21145	4.41596	3.08373	2.44828	6.22816	6.73843	4.08947	5.37828	1.51368	2.36339	8.83001	2.32384	2.68632	3.03279		2.58432	3.17606	2.87996	2.18747	4.70348	4.91713	6.25527	9.30237	10.0069
nzl	6.84657	10.7576	8.34354	7.46271	7.04371	6.49533	10.5377	7.85013	9.73999	6.58673	6.40024	6.44535	6.95984	8.51145	9.00351	11.0065	7.56032	5.90727	6.00077		5.4227	6.1233	6.69821	6.3751	5.53085	5.62915	7.20518	10.3291
nor	4.16097	2.20627	2.26727	0.383765	3.35887	0.347739	0.804563	1.16673	2.47074	3.71976	4.6213	1.70025	0.771339	0.503245	3.37161	2.61914	2.84232	0.917915	2.02685	1.35054		3.70758	5.30725	6.03648	6.53046	0.448754	3.37045	3.07791
pol	0.934588	2.13768	3.40597	2.23417	11.7123	1.10066	4.84391	0.822117	1.55617	0.0786012	0.0940126	8.7518	2.11734	4.60993	4.0476	0.155033	1.7683	1.85494	0.191385	0.121651	0.120644		0.828331	0.220224	9.44237	4.57469	2.8032	0.663475
prt	23.4092	20.503	14.7909	26.8796	19.0776	21.2485	20.2838	20.5406	20.6461	14.3521	20.8823	15.9312	20.9916	30.2248	23.146	17.5349	22.1758	26.6432	14.1995	21.7517	25.814	17.2216		13.361	16.6531	20.7388	24.7756	23.9684
swe	3.47979	2.3955	3.41857	4.06596	0.20963	1.99077	1.60504	0.270872	4.44505	0.131514	6.1368	0.295029	0.694701	0.457897	0.26695	0.245603	2.66172	0.32086	0.752993	7.49568	0.151445	1.26592	2.97011		4.05162	0.465497	5.65321	2.94571
che	16.1425	11.0835	11.3798	16.6513	10.5477	11.8064	19.0213	13.4752	12.1921	14.4128	19.4332	11.0409	14.5033	12.7111	15.8511	11.4632	18.5335	12.5214	10.6474	10.9947	14.2941	15.4912	12.6147	17.6776		11.4516	21.4763	21.1266
tur	0.444441	0.593631	0.529508	1.37717	1.07084	0.806172	0.785916	1.15435	1.36373	0.378227	1.47206	0.550983	1.44415	0.909669	0.71254	0.897905	3.02397	1.86387	0.831637	4.35264	2.00602	0.451969	2.89103	1.54634	6.45814		0.656147	0.587997
gbr	1.04026	7.00107	3.99907	1.19858	2.97975	2.70548	1.52206	1.80168	4.73187	1.43944	5.5409	1.17101	2.92654	2.73249	1.21683	1.03541	4.20105	3.90706	3.34798	3.56582	3.74322	1.11585	4.14839	3.46682	4.87038	4.23949		1.08987
usa	4.31848	8.47484	4.36733	2.85782	7.74388	7.02574	3.14723	3.34522	4.11732	3.99297	3.13668	5.83379	4.60159	3.91847	2.80084	2.78468	6.70574	6.28813	4.83263	3.03469	3.69586	6.02042	3.93999	2.98919	8.61464	3.47619	6.43737

## Sheet: HP filtered
	aus	aut	bel	can	chl	dnk	fin	fra	ger	grc	hun	isl	irn	isr	ita	jpn	kor	lux	mex	nld	nzl	nor	pol	prt	esp	swe	che	tur	gbr	usa
aus		7.94716	9.87749	5.77418	3.11223	6.23993	6.36676	7.911	4.36906	3.96243	4.21444	7.56408	7.20831	0.617871	10.9623	5.96992	3.10122	5.41044	5.2017	4.01397	0.0845803	5.17649	9.20803	11.9627	4.82284	4.88384	9.71504	4.843	11.5525	7.69067
aut	6.87498		7.19054	6.99604	0.523414	4.84931	3.46666	8.02912	7.27238	8.72117	4.19066	3.22701	1.12416	0.499322	5.18666	5.86842	1.01388	3.82138	4.28208	4.30185	2.78145	2.7272	3.16247	5.01977	7.18144	5.82026	0.534886	3.62461	11.0588	10.1173
bel	11.1988	3.85299		12.9389	4.49869	2.89656	2.3252	3.95709	4.41946	7.96462	5.49372	4.86235	1.23132	0.613465	0.610826	10.4091	1.72827	0.82465	11.6015	1.15552	3.5164	3.71309	5.79582	3.68631	6.76238	4.31988	3.357	3.84623	13.4507	16.1915
can	0.170052	3.99807	6.04351		8.48954	1.33308	0.0919422	2.24831	5.16867	2.77127	4.17941	0.108764	0.856921	1.59556	7.39797	7.2336	1.44227	4.27227	8.79271	0.935453	0.404688	1.28402	3.52563	2.60015	0.160346	0.235043	6.33487	2.77992	3.48256	0.173434
chl	13.3454	12.2476	12.3927	11.8651		11.4961	16.1717	9.49633	9.57529	10.5268	12.2801	11.9358	25.1508	10.4238	10.0695	10.2335	19.9679	9.60025	10.2672	9.06717	11.5068	11.7987	10.9546	9.41973	12.4872	13.2947	15.7066	10.3885	8.27725	10.5708
dnk	9.51564	9.31467	9.38265	10.2484	10.1092		4.44413	7.70371	12.701	7.64712	12.7961	6.63967	3.55217	7.17001	7.57653	12.3397	6.71997	10.9696	6.12636	6.0542	12.4629	4.15344	4.2512	7.54547	6.9966	6.11326	6.42285	5.92099	9.52566	12.3731
fin	10.5758	11.8416	4.95256	4.56973	3.69194	2.96031		3.6358	4.64338	2.75165	6.48181	3.74812	1.50949	2.28739	3.45018	6.99955	3.8462	7.60786	2.40491	3.11393	4.33621	3.01788	1.92091	3.69876	3.95823	1.61528	3.36826	3.17834	9.45892	3.76714
fra	6.59583	5.37035	4.6985	8.12397	4.78244	3.98559	3.06315		6.31961	6.58591	8.15141	4.87919	3.05786	3.2427	4.08849	9.50911	3.1224	2.40848	8.61638	4.06964	5.7405	4.40273	5.52584	4.21459	7.09043	4.4434	5.53369	3.18317	6.34701	7.08089
ger	0.262265	0.506588	3.13252	0.917996	5.51722	3.08874	0.373514	1.17036		3.20498	3.74596	0.762776	0.531278	0.808861	0.516248	4.12411	2.0655	0.248583	5.93766	4.41235	2.36457	0.933205	2.4508	0.252618	3.77286	0.442321	3.24758	3.81246	3.72588	0.9882
grc	13.1275	14.0102	9.24931	29.9778	16.3262	19.9152	19.9439	23.0192	15.5159		31.9138	13.3663	30.2642	12.9866	9.85408	14.448	14.6168	11.1235	16.7204	15.5709	11.9771	12.7651	23.0599	20.1515	30.5026	21.639	16.6895	13.9981	28.7596	16.5776
hun	1.71803	0.757307	1.60602	1.78132	2.44147	1.70003	0.0259496	0.444762	1.16568	1.39861		0.386198	0.470644	3.19715	0.00936353	5.37923	1.2921	3.79368	2.25697	0.637792	0.823001	2.36204	3.05491	0.456508	0.051131	0.629084	2.27548	0.131868	0.198204	0.0585976
isl	5.6975	0.165341	2.47921	7.86077	3.50851	1.66623	6.04857	3.73163	2.98081	7.99022	7.64503		3.70885	11.6654	4.20663	7.3096	2.56845	3.95921	3.21272	0.310088	5.77292	3.65005	1.35381	2.08266	3.71802	9.02713	2.52251	4.06353	6.49508	6.35793
irn	1.04375	8.1512	3.6001	1.37829	2.69464	5.75159	2.17492	3.70708	5.0054	4.21773	0.506343	0.336562		1.74746	6.66182	4.01094	3.79245	0.200339	0.32898	1.54066	2.09844	0.31213	4.12291	5.04067	3.3109	0.199838	6.82923	2.14208	4.26652	3.95711
isr	6.25232	4.86208	1.47183	3.78479	2.77584	3.38506	3.26709	2.83412	0.197581	2.5465	2.91859	4.89806	2.79771		0.24314	4.25337	6.88838	2.48079	4.2465	2.73717	0.846042	4.26609	3.54178	2.4059	2.11959	0.754817	3.52593	3.24574	3.74135	3.79713
ita	6.24271	4.06749	5.68073	8.86593	7.0175	4.40693	3.90373	8.98003	6.15827	10.6463	9.43552	5.74785	3.69527	3.92038		13.8931	3.63875	3.54514	9.01101	4.18798	4.46322	4.80113	5.34988	7.07861	5.92543	6.90527	6.47692	3.05784	9.63744	6.67184
jpn	10.0273	12.1073	11.3827	12.1976	11.0006	8.75771	6.57709	12.1292	11.3316	10.9988	12.7797	8.93212	12.425	9.39248	9.1745		12.653	9.31022	9.64115	5.83624	9.06517	15.9793	10.9648	12.417	7.59917	7.57968	6.73772	10.9003	14.1049	9.2461
kor	0.0299715	0.147926	0.0555104	0.926533	6.23433	0.0191766	4.20325	0.513049	0.121812	0.26566	1.91049	0.390599	7.13478	0.235298	0.374834	0.132136		0.63323	4.81901	0.0248043	0.296896	1.64659	0.0278194	0.0117053	3.63975	0.37875	0.75935	0.35776	1.56482	0.611204
lux	3.71861	4.70099	4.11588	3.94347	6.75199	2.95765	4.01693	3.93545	6.61767	5.09025	4.72676	4.41829	3.41004	3.34512	1.47371	6.92105	3.27483		8.07156	4.42012	4.84	3.17952	3.0082	3.49633	6.97475	5.05539	3.18947	5.25221	9.05759	6.14719
mex	0.14369	0.936476	1.10001	0.177981	4.79465	1.31411	0.0993026	1.881	1.23713	2.72987	0.103298	0.20321	3.65988	0.841882	1.52755	1.2043	0.327548	0.243029		0.681575	2.81816	0.633928	0.214886	1.58125	0.294259	0.316892	0.0780233	0.718249	0.075581	0.0735071
nld	2.67984	8.28065	2.84728	2.72523	4.8732	3.82416	4.07084	6.97072	13.5671	7.2959	4.81032	4.43919	5.18361	3.1672	4.52876	6.31887	3.2354	9.16724	5.40378		3.80898	3.86875	5.41377	3.56016	4.72366	3.57828	7.32052	4.61746	7.89294	5.23489
nzl	8.9907	20.7548	31.1155	8.11156	21.2932	7.07982	7.50901	15.4062	29.3053	7.95493	14.3107	7.61075	6.1684	12.7364	19.6052	25.0257	11.5232	21.9079	9.90881	18.2344		7.15886	9.86347	16.4929	13.7284	8.53367	9.1654	6.87357	11.6278	8.07704
nor	3.63071	6.95268	11.8383	4.77349	3.77502	2.35787	3.06791	8.34168	11.4298	5.48753	7.67794	6.19297	5.18672	2.11567	7.10195	5.78961	2.02702	9.8872	5.69276	5.51904	4.21661		4.46764	9.75596	3.91393	8.54767	9.96673	2.03345	7.69432	7.06191
pol	1.50554	3.64827	2.61807	1.30645	11.316	3.38812	2.41512	3.24137	3.41134	2.3314	0.975732	1.0866	11.2228	1.47378	6.72698	3.77201	0.871677	3.50901	3.08597	0.880748	2.51154	5.56962		2.50058	0.906195	0.893058	8.86827	6.09298	2.56542	1.04961
prt	16.9113	12.6001	17.3471	17.3046	18.5338	12.9219	14.023	12.2122	12.3024	16.3887	12.1783	23.266	22.567	14.8046	18.7191	13.5634	18.1303	16.8782	32.2596	15.1344	13.1862	13.0418	17.0256		18.0219	11.8246	14.9497	12.264	16.0076	14.7487
esp	4.68048	14.1636	8.45076	4.58878	5.30523	4.3313	4.63161	5.17469	7.20105	4.6486	8.88072	8.88065	4.81643	5.17553	4.93842	6.2799	3.949	6.77481	9.18246	4.13187	7.82739	4.09458	4.46948	4.67416		5.59041	9.54786	4.47172	6.81116	4.83481
swe	2.57657	5.65428	4.17797	5.78023	2.17245	0.348426	1.06795	0.410827	6.79439	0.345807	17.4604	2.28295	0.346312	4.24704	1.10831	5.19491	0.981649	2.68359	3.90405	1.80205	4.96633	0.363086	0.768623	2.9037	1.13409		0.412744	2.97614	5.05466	2.8108
che	14.5639	12.1707	13.01	11.6192	10.0846	10.9454	15.4196	15.6043	10.9819	16.9057	12.207	15.6058	7.86028	11.003	11.0673	12.9013	9.11053	13.5414	11.8773	9.42061	11.1854	13.3608	13.092	18.4194	14.2728	15.6639		8.56474	19.4828	14.1859
tur	3.97674	3.55026	2.86781	4.77388	3.52627	3.12811	3.64122	1.99003	1.99862	4.15046	6.14093	3.42106	2.74455	2.76175	3.0853	3.52394	5.05752	3.64032	4.34881	3.40433	3.58707	3.61254	2.91949	3.19543	4.07413	3.25378	4.74774		2.34177	3.38833
gbr	6.33946	15.5146	10.709	8.30242	6.54777	6.60176	6.0893	6.80627	8.28779	6.90204	8.36089	7.86815	6.32332	6.70475	7.21557	8.04123	6.80191	5.39365	6.70659	7.4412	5.39603	6.2971	6.25558	6.02461	17.0019	6.42879	10.176	4.71133		6.31014
usa	3.08764	7.48526	5.38908	1.7358	6.17567	2.00543	0.89488	3.89761	8.03882	4.6895	3.16274	3.20931	4.4745	3.29665	5.32206	7.03472	1.41933	5.42346	7.05708	1.67043	3.89375	2.61166	3.89309	3.9401	3.93848	2.14879	8.94996	4.12235	4.25504

## Sheet: Notes
	Note:
	This file contains information regarding the F statistics as produced by the Granger causality tests between country i (on rows) and country j (on columns).
	Diagonals' values are missing since we do not run causality tests between a time series and itself.
	There are two sheets, one for the data in growth specification (log differenced) and one for HP filtered data, namely Growth data sheet and HP filtered data sheet.
	The abbreviations correspond to the names which can be found in Table 1.
